# Supplementary material for: Differentiation of Diabetes by Pathophysiology, Natural History, and Prognosis
Source: Oxford University Press journal article supplement (doi:10.2337/db16-0806), 2016-12-15
Supplement: db160806supplementarydata.pdf [file db160806supplementarydata.pdf]

SUPPLEMENTARY DATA

**Supplementary Table S1. Consensus recommendations on research gaps to address precision medicine for diabetes**

|                                                                                                                                                                                                                                                                                              |
|----------------------------------------------------------------------------------------------------------------------------------------------------------------------------------------------------------------------------------------------------------------------------------------------|
| <b>Research Gaps Related to Demographics</b>                                                                                                                                                                                                                                                 |
| Establish drivers of increased risk for type 2 diabetes in individuals of low socioeconomic status.                                                                                                                                                                                          |
| Define factors associated with race/ethnicity and geography that differentially increase risk for type 1 diabetes and for type 2 diabetes.                                                                                                                                                   |
| <b>Research Gaps Related to Genetics</b>                                                                                                                                                                                                                                                     |
| Determine genetic influences that affect rate of progression of diabetes.                                                                                                                                                                                                                    |
| Define phenotypic subtypes of diabetes and investigate specific genetic associations.                                                                                                                                                                                                        |
| Develop precision medicine and tests to predict response to—and side effects of—therapies.                                                                                                                                                                                                   |
| <b>Research Gaps Related to Environmental Influences</b>                                                                                                                                                                                                                                     |
| Define public health interventions that successfully reduce the levels of consumption of energy dense foods and/or reduce sedentary time and increase time spent in physical activity; determine whether these interventions reduce type 2 diabetes incidence at a population level.         |
| Determine the role of gene-environment interactions.                                                                                                                                                                                                                                         |
| Determine the role of the intestinal microbiota in pathogenesis of type 1 and type 2 diabetes and response to therapies.                                                                                                                                                                     |
| Determine causal environmental etiologies of type 1 diabetes and their relative contribution to onset of autoimmunity and progression to symptomatic disease.                                                                                                                                |
| <b>Research Gaps Related to <math>\beta</math>-Cell Mass and Function</b>                                                                                                                                                                                                                    |
| Determine the role of $\beta$ -cell dedifferentiation in type 1 diabetes and type 2 diabetes.                                                                                                                                                                                                |
| Ascertain the extent to which insulin resistance contributes to glycemia and the complications of type 1 diabetes.                                                                                                                                                                           |
| Define the molecular basis for the glucose-specific insulin secretory defect in type 2 diabetes.                                                                                                                                                                                             |
| Determine the point at which $\beta$ -cell dysfunction becomes irreversible.                                                                                                                                                                                                                 |
| Establish whether common etiologic factor(s) are the basis for abnormal insulin secretion patterns in type 1 diabetes and type 2 diabetes.                                                                                                                                                   |
| Develop biomarkers and imaging to assess $\beta$ -cell mass and loss and functional mass and to monitor progression and responses to therapeutic interventions.                                                                                                                              |
| Determine mechanisms by which $\beta$ -cells can overcome an insulin resistant environment.                                                                                                                                                                                                  |
| Determine whether increased $\beta$ -cell activity, stimulated by insulin resistance, enhances or accelerates the $\beta$ -cell lesion.                                                                                                                                                      |
| <b>Research Gaps Related to Autoimmunity and Inflammation</b>                                                                                                                                                                                                                                |
| Determine whether different antigenic targets, single antibody positivity, or other contributing factors have different prognostic, genetic and environmental correlates that can be used to better develop and apply stage-appropriate personalized therapies                               |
| Develop inexpensive, specific and sensitive assays to identify $\beta$ -cell autoimmunity on a population-wide level and beyond the confines of specialized laboratories.                                                                                                                    |
| Develop biomarkers and imaging to define reversion or stable autoimmunity versus active or flaring autoimmunity, and to monitor responses to therapeutic interventions.                                                                                                                      |
| Understand how $\beta$ -cells die or fail in the presence of $\beta$ -cell autoimmunity.                                                                                                                                                                                                     |
| Define the role of inflammatory factors in the pathophysiology of type 1 and type 2 diabetes.                                                                                                                                                                                                |
| <b>Research Gaps Related to Therapeutics</b>                                                                                                                                                                                                                                                 |
| Determine appropriate immune therapies to be used in combination (sequentially or simultaneously) to target the $\beta$ -cell specific immune response, islet inflammation, and more global defective immunoregulation.                                                                      |
| Develop evidence-based targets to avoid cardiovascular complications in type 1 diabetes. Current treatment recommendations for management of cardiovascular risk factors predominantly come from data in type 2 diabetes, or in populations that did not discriminate between diabetes type. |

## SUPPLEMENTARY DATA

|                                                                                                                                                                                                                                                                                                                                                                                                                                                                                                                                                                                                                                                                                                                                                                                 |
|---------------------------------------------------------------------------------------------------------------------------------------------------------------------------------------------------------------------------------------------------------------------------------------------------------------------------------------------------------------------------------------------------------------------------------------------------------------------------------------------------------------------------------------------------------------------------------------------------------------------------------------------------------------------------------------------------------------------------------------------------------------------------------|
| Develop combinations of immune and $\beta$ -cell targeted therapies for type 1 diabetes.                                                                                                                                                                                                                                                                                                                                                                                                                                                                                                                                                                                                                                                                                        |
| Determine rationale for early combination of glucose lowering agents in type 2 diabetes.                                                                                                                                                                                                                                                                                                                                                                                                                                                                                                                                                                                                                                                                                        |
| Define the impact and durability of specific therapies on $\beta$ -cell function and mass.                                                                                                                                                                                                                                                                                                                                                                                                                                                                                                                                                                                                                                                                                      |
| Determine whether weight loss medication and bariatric surgery should be used to support treatment goals in people with diabetes who are overweight and obese.                                                                                                                                                                                                                                                                                                                                                                                                                                                                                                                                                                                                                  |
| Perform studies in vulnerable populations, including the elderly and children.                                                                                                                                                                                                                                                                                                                                                                                                                                                                                                                                                                                                                                                                                                  |
| <b>Research Gaps Related to Complications</b>                                                                                                                                                                                                                                                                                                                                                                                                                                                                                                                                                                                                                                                                                                                                   |
| Delineate mechanisms of complications in type 1 diabetes and in type 2 diabetes and the differences between them to drive the development of new therapeutics                                                                                                                                                                                                                                                                                                                                                                                                                                                                                                                                                                                                                   |
| Identify better predictors of kidney disease progression.                                                                                                                                                                                                                                                                                                                                                                                                                                                                                                                                                                                                                                                                                                                       |
| Determine whether environmental exposures or genetics drive development of diabetic complications                                                                                                                                                                                                                                                                                                                                                                                                                                                                                                                                                                                                                                                                               |
| Develop the evidence base for preventing and treating complications through randomized clinical trials to: <ul style="list-style-type: none"><li>• determine the clinical benefits of screening and early treatment to normalize glucose levels in people with presymptomatic diabetes;</li><li>• examine effective glucose control in various populations with co-morbidities and complications and compare different strategies to achieve glucose control;</li><li>• identify how complications of diabetes affect one another and treatment approaches to each;</li><li>• determine whether fibrates modify the natural history of retinopathy, and, if so, what the mechanisms are;</li><li>• determine appropriate lipid targets in type 1 and type 2 diabetes.</li></ul> |
